# Supplementary material
Source: PubMed Central journal article supplement (PMC4800489)
Supplement: NIHMS764496-supplement-01.pdf [file NIHMS764496-supplement-01.pdf]

**Online Table. Unadjusted and Adjusted<sup>a</sup> Multivariable Regression Results for Factors Associated with Documentation of Provider Assessment of Access to Lethal Means (Including but not Limited to Firearms; n=679)**

|                                                            | Unadjusted |            | Adjusted |            |
|------------------------------------------------------------|------------|------------|----------|------------|
|                                                            | OR         | 95%CI      | OR       | 95%CI      |
| <b>Demographics</b>                                        |            |            |          |            |
| Male gender                                                | 1.18       | 0.95, 1.46 |          |            |
| Hispanic ethnicity                                         | 0.82       | 0.59, 1.13 |          |            |
| <b>Psychiatric history</b>                                 |            |            |          |            |
| Documented history of suicide attempt                      |            |            |          |            |
| Yes, any time frame                                        | 0.93       | 0.72, 1.19 | 0.75     | 0.55, 1.02 |
| No                                                         | Ref.       |            | Ref.     |            |
| Missing                                                    | 0.48       | 0.33, 0.69 | 0.42     | 0.27, 0.67 |
| Intoxicated (based on blood alcohol level)                 | 0.71       | 0.51, 0.97 |          |            |
| Documented intentional illegal or prescription drug misuse | 1.22       | 0.97, 1.52 |          |            |
| <b>ED visit characteristics</b>                            |            |            |          |            |
| Chief complaint involves psychiatric issue                 | 3.00       | 1.97, 4.56 | 1.81     | 1.04, 3.15 |

|                                                            |      |            |      |            |
|------------------------------------------------------------|------|------------|------|------------|
| Documented interpersonal violence                          |      |            |      |            |
| Yes (any time frame)                                       | 1.64 | 1.16, 2.32 | 1.13 | 0.74, 1.75 |
| No                                                         | Ref. |            | Ref. |            |
| Missing                                                    | 0.47 | 0.36, 0.60 | 0.18 | 0.12, 0.28 |
| Documented domestic violence                               |      |            |      |            |
| Yes (any time frame)                                       | 2.18 | 1.48, 3.23 |      |            |
| No                                                         | Ref. |            |      |            |
| Missing                                                    | 1.38 | 1.09, 1.75 |      |            |
| Evaluated by a mental health professional during visit     |      |            |      |            |
| Yes                                                        | Ref. | 0.09, 0.30 | Ref. |            |
| No                                                         | 0.17 | 0.10, 0.30 | 0.08 | 0.04, 0.16 |
| Missing                                                    | 0.16 |            | 0.19 | 0.09, 0.38 |
| ED visit disposition                                       |      |            |      |            |
| Admitted/transferred to psychiatric/mental health facility | Ref. |            |      |            |
| Discharged home                                            | 0.69 | 0.54, 0.89 |      |            |
| Other                                                      | 0.34 | 0.23, 0.51 |      |            |

CI, confidence interval. <sup>a</sup>Also adjusted for study phase and site. Adjusted model built with a cut-off of  $p < 0.25$  in bivariable analysis for inclusion of candidate variables in the multivariable model, followed by sequential backwards elimination of least significant variables, with checking of effects on other variables. The final model included only factors that were significant at  $p < 0.05$  in the adjusted model.
